# Supplementary material for: Mediation of effects of biofiltration on bacterial regrowth,Legionella pneumophila, and the microbial community structure under hot water plumbing conditions
Source: Royal Society of Chemistry journal article supplement (doi:10.1039/c7ew00301c), 2017-10-25
Supplement: c7ew00301c1.pdf [file c7ew00301c1.pdf]

1 **Mediation of effects of biofiltration on regrowth, *Legionella pneumophila*, and**  
2 **microbial community structure by hot water plumbing conditions**

3

4 Dongjuan Dai, Caitlin R. Proctor, Krista Williams, Marc A. Edwards, Amy Pruden

5

6 **Supplementary Information**

7

8 **Experimental and Results**

9 ***SI.1: The 2.5 Years Acclimation Period Prior to Experimental Period***

10 In the first year of acclimation, SWHs were sequentially fed with synthesized water (for  
11 3-4 months, phase A1), a mixture of synthesized water (90% volume) + breakpoint  
12 chlorinated and biofiltered Blacksburg tap water (10% volume, microbes in the  
13 biofiltered water were not filtered out) first without (for 5-6 months, phase A2) and then  
14 with (for 1-2 months, phase A3) supplemented trace nutrients including manganese, iron,  
15 zinc and amino acids. Details of the synthesized water, tap water treatment, and  
16 supplementation were described in a previous study.<sup>1</sup> Microbes naturally present in the  
17 biofiltered Blacksburg tap water during phase A2 and A3, along with the inoculated  
18 stationary cultures of *L. pneumophila* (ATCC 33152, 33733, 33734, 33823, total  
19  $6.78 \times 10^6$ /mL), *Acanthamoeba polyphaga* (ATCC 30871,  $5.42 \times 10^2$ /mL), and  
20 *Vermamoeba vermiformis* (ATCC 50237,  $1.69 \times 10^3$ /mL) at the beginning of phase A1 and  
21 A3 were used to seed SWHs. More details are in the study by Williams *et al.*<sup>1</sup>. All SWHs  
22 were incubated at 32°C in the dark.

23 Beginning at the second year of acclimation, SWHs were modified with each of  
24 the eight plumbing conditions described in the plumbing conditions section in Materials  
25 and Methods. Water fed to SWHs was biofiltered or unfiltered Blacksburg tap water  
26 treated in the same way as described in the Materials and Methods (influent water  
27 section), except that sodium thiosulfate (3 mg/L) was used to quench breakpoint chlorine  
28 residual instead of heating and cooling. Microbes in the influent water (biofiltered or  
29 unfiltered) were removed with a 0.45 µm membrane before feeding SWHs. Water was  
30 changed in the same way as described in the Materials and Methods (the water changes  
31 section), except with a lower frequency of bi-weekly change rather than three times a  
32 week.

33 At the end of the 2.5-years acclimation period, SWHs were cross-inoculated as  
34 described in the Materials and Methods (the acclimation prior to the experimental period  
35 section) to initiate the experimental period, which lasted for a total of 448 days. Results  
36 presented in this study were acquired from the experimental period if not specified.

37

38 ***SI.2: Town of Blacksburg, VA Municipal Water***

39 Town of Blacksburg VA municipal water was treated conventionally in the facility,  
40 without biofiltration and with chloramine as residual disinfectant. This water had an  
41 average chlorine residual of 2.2 ppb, a total nitrogen (N) of 0.65 ppm, and copper of 0.06  
42 ppm (90<sup>th</sup> percentile). More details about this water can be acquired from online reports:  
43 2012 water quality report for the town of Christiansburg.  
44 [<http://www.christiansburg.org/DocumentCenter/View/3568>]

45

46 ***SI.3: Characterization of Inorganic Elements in the Water***

47 Water chemistry of biofiltered and unfiltered influent water was characterized via  
48 inductively coupled plasma mass spectrometry (ICP-MS, Thermo Electron, Waltham,  
49 MA). Ten milliliters of water was collected in sterile test tubes and acidified by adding  
50 2% nitric acid by mass prior to analysis.

51

52 ***SI.4 Water Chemistry, Organic Carbon, and Heterotrophic Bacteria Monitoring***

53 Water chemistry, including assimilable organic carbon (AOC), biodegradable dissolved  
54 organic carbon (BDOC), total organic carbon (TOC), dissolved oxygen, and pH, along  
55 with total bacterial growth (heterotrophic plate count (HPC) and 16S rRNA gene copy  
56 numbers) and *L. pneumophila* numbers (*mip* gene copy numbers), were occasionally  
57 monitored during the later 1.5-years of acclimation. HPC varied between  $1 \times 10^5$  and  
58  $1 \times 10^6$  CFU/mL, while 16S rRNA gene copies were  $1 \times 10^6 - 10^7$ /mL in bulk waters of  
59 SWHs in the acclimation period.

60 AOC in influent waters and SWH bulk waters was measured routinely for about  
61 one year, but the reproducibility of AOC measurements (with the standard method  
62 9217B<sup>2</sup> and a bioluminescence method<sup>3</sup>) was poor thus results were not publishable.  
63 Furthermore, it was questionable whether the two strains implemented in the AOC  
64 measurement were fully representative of the thousands of heterotrophic bacteria present  
65 in drinking water. Therefore the organic carbon measurement was switched to BDOC and  
66 TOC. BDOC in biofiltered water was  $0.157 \pm 0.146$  mg/L, comparable to the amount of  
67 consumed organic carbon quantified by TOC measurement ( $\text{TOC}_{\text{in}} - \text{TOC}_{\text{out}} = 0.122 \pm 0.05$   
68 mg/L), which was simpler and more reproducible.

69

70 ***SI.5: Organic Carbon Leaching from PEX Pipes***

71 Leaching of organic carbon from pipe materials was evaluated in SWHs used for this  
72 study on days 232 and 448 of the experimental period (i.e., post cross-inoculation), as  
73 well as in a similar set of SWHs incubated at higher temperatures. For TOC  
74 measurements during the second year of acclimation, the top (5 mm) and bottom (5 mm)  
75 layers of bulk water in two sets of SWHs, with PEX pipe and the no-modification Control,  
76 were pipetted out slowly while minimizing the disturbance to the water column and  
77 biofilms. Each set consisted of 15 SWHs fed with biofiltered or unfiltered water.  
78 Leaching of organic carbon was observed only in SWHs fed with biofiltered water.  
79 Specifically, SWHs with PEX pipe yielded 0.10-0.19 mg/L more TOC in both top and  
80 bottom layers of water column in comparison to the Control (Figure S8), although this  
81 difference was not statistically significant due to large variation among SWH replicates  
82 (0.07-0.45 mg/L). TOC leached from the PEX pipe (10 cm × ø1.9 cm) at an approximate  
83 rate of 0.006 mg/day at 32°C.

84 On day 232 and 448 of the experimental period of this study, decanted water from  
85 triplicate SWHs during water changes were collected, mixed, and pooled for TOC  
86 measurement. On day 448, SWHs with PEX pipe contained slightly more TOC (0.05  
87 mg/L) than the Control when both fed with biofiltered water (Figure S8).

88 Leaching of organic carbon from PEX pipe was further evaluated in a similar set  
89 of SWHs, with PEX pipe and with copper pipe as a control, both fed with unfiltered  
90 water and incubated at two higher temperatures - 37°C and 53°C. Decanted water from  
91 triplicate SWHs during water change were collected, mixed, and pooled for TOC

92 measurement. Leaching of organic carbon from PEX pipe was obviously observed at  
93 53°C, as effluent water in SWHs with PEX pipe had 55% more TOC than SWHs with  
94 copper pipe, and 50% more TOC than influent water (Figure S9). TOC leaching from the  
95 PEX pipe (10 cm × ø1.9 cm) occurred at a higher rate of 0.018 mg/day at 53°C than at  
96 32°C.

97

#### 98 ***SI.6: Hydrogen Production Associated with the Magnesium Rod***

99 Hydrogen (H<sub>2</sub>) concentration in bulk water was measured by dispensing 20 mL water  
100 from each SWH into an airtight 40mL glass vial, vigorously shaking the vial to allow  
101 equilibration between water and gas, followed by measuring the headspace H<sub>2</sub> with a  
102 Trace Analytical™ KAPPA-5/E-002 gas chromatograph with a reduced gas detector  
103 (Menlo Park, CA), and a final back calculation into aqueous concentration using Henry's  
104 Law.

105 Bulk water from SWHs with a magnesium rod (MgRod and Combination  
106 modifications) contained 530±54 µM H<sub>2</sub>, which was 32× higher than that which was  
107 measured from SWHs without a magnesium rod (16±7 µM H<sub>2</sub>) (Figure S9). The average  
108 H<sub>2</sub> generation rate from the magnesium rod was 22.0±2.3 µmol/day.

109

#### 110 ***SI.7: Impact of Plumbing Modifications on Unique OTUs***

111 The impact of individual plumbing modification on the hot water microbiome was  
112 examined by identifying OTUs detected in conditions containing a given plumbing  
113 modification, but not in the no-modification Control condition. This was achieved using  
114 the Venn command in Mothur (1.36.0). The Combination condition had ~500 unique

115 OTUs, accounting for 16-17% of the microbial community, regardless of whether the  
116 influent was biofiltered (Table S3). The addition of an iron rod stimulated unique OTUs  
117 to a greater extent with unfiltered water (abundance of these unique OTUs=8.0%) than  
118 with filtered water (2.5%). In comparison, unique OTUs stimulated by other  
119 modifications (Fe(OH)<sub>3</sub>, PEX, or Ammonium) represented only a small proportion of the  
120 microbial community (0.5-2.5%).

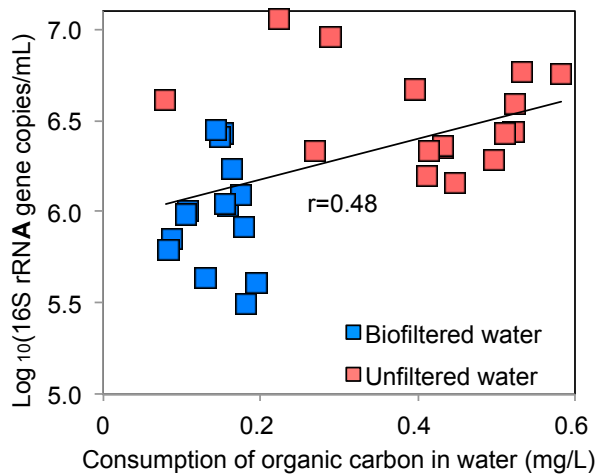

121

122 **Fig. S1.** Positive correlation between total bacterial numbers (log<sub>10</sub>-transformed) in hot  
123 water and consumption of organic carbon in SWHs. Total bacterial numbers were  
124 measured as 16S rRNA gene copies/mL. The consumption of organic carbon during each  
125 water change cycle was determined as  $TOC_{influent} - TOC_{effluent}$ . Spearman's correlation  
126 coefficient  $r$  is 0.48 ( $p < 0.001$ ). Blue symbols: biofiltered water; Red symbols: Unfiltered  
127 water.

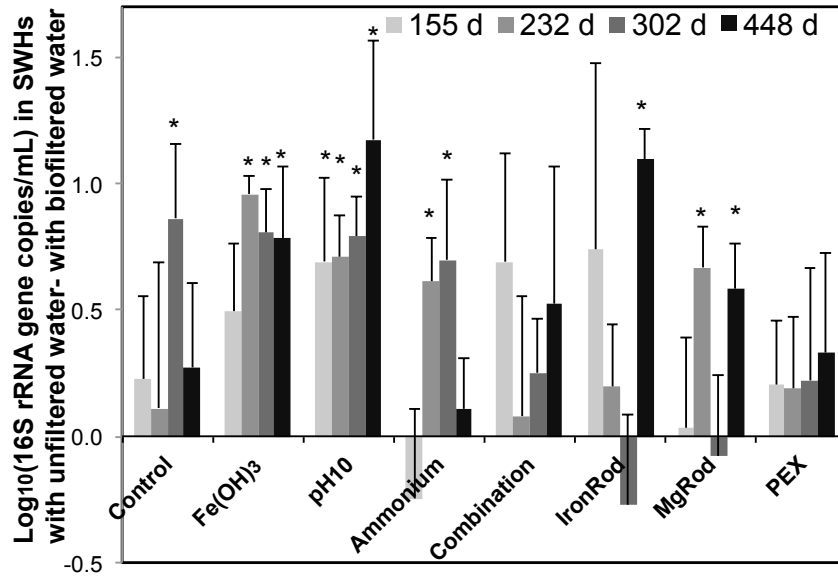

128

129 **Fig. S2.** Reduced bacterial regrowth in hot water attributed to influent biofiltration when  
 130 modified with plumbing conditions. Reduced bacterial regrowth is shown as total  
 131 bacterial numbers (16S rRNA gene copies/mL) in SWHs fed with biofiltered water being  
 132 subtracted from those in SWHs fed with unfiltered water. Error bars are standard  
 133 deviations calculated from two groups of triplicate SWHs used for the subtraction. \*  
 134 indicates significant difference in total bacterial numbers in SWHs between biofiltered  
 135 water and unfiltered water ( $p < 0.05$ ).

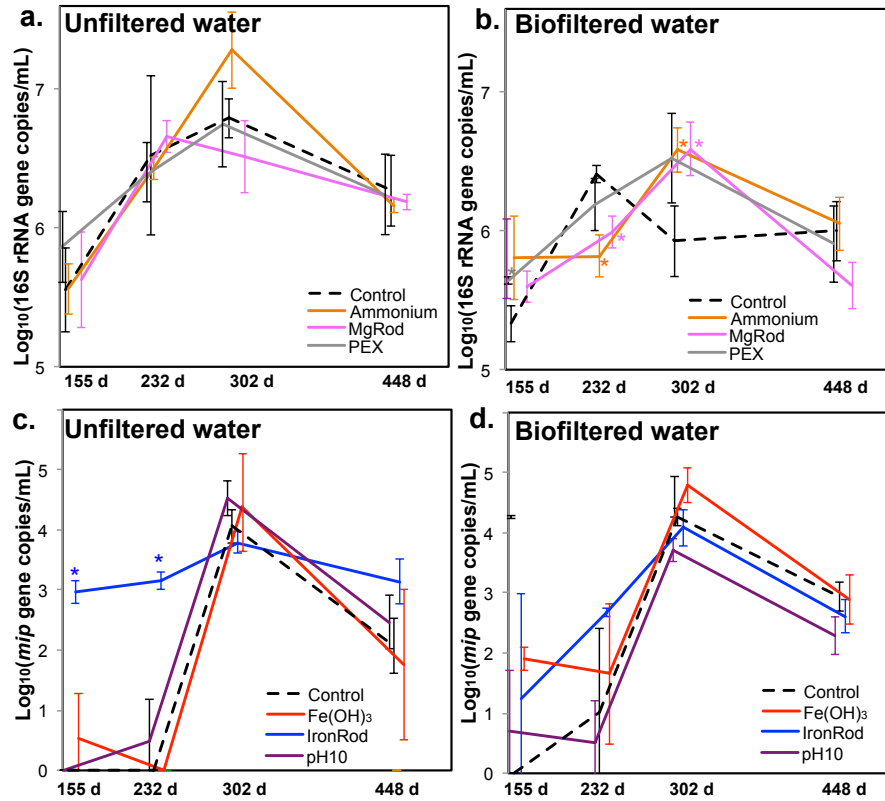

136

137 **Fig. S3.** Effect of other plumbing conditions (not shown in Figure 2) on total bacterial  
 138 (16S rRNA gene copies/mL) and *L. pneumophila* numbers (*mip* gene copies/mL) in  
 139 SWHs receiving unfiltered (a, c) or biofiltered (b, d) waters. Other figure legends are the  
 140 same as in Figure 2.



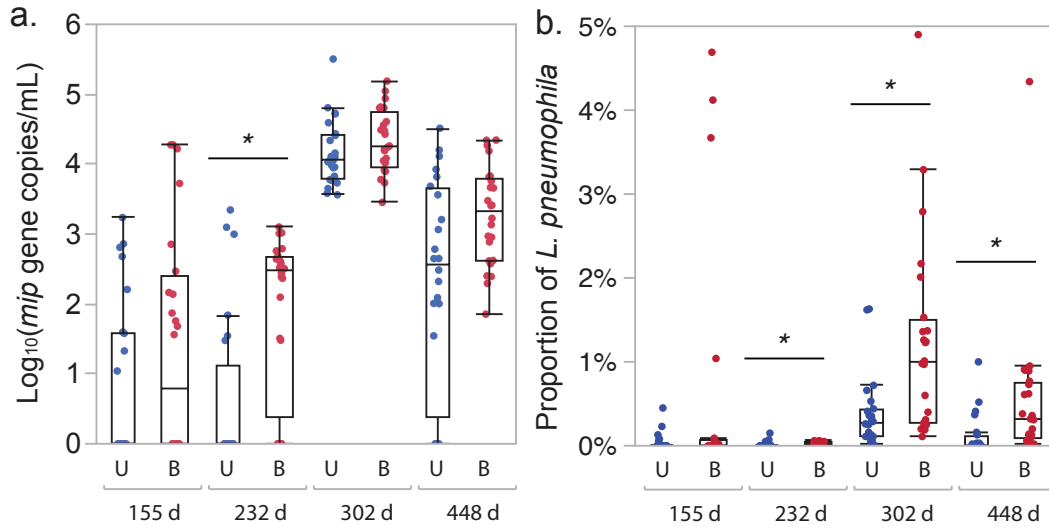

141 **Fig. S4.** Effect of biofiltration of influent water on the absolute (a) and relative (b)  
 142 numbers of *L. pneumophila* in SWHs. *L. pneumophila* numbers are shown as *mip* gene  
 143 copy number/mL. Proportion of *L. pneumophila* is estimated as the ratio of numbers of  
 144 *mip* gene to 16S rRNA gene. U: unfiltered water; B: biofiltered water. An outlier box-plot  
 145 for each group of 24 SWHs is shown on top of single data points. Symbol \* indicates  
 146 significance (p < 0.05).

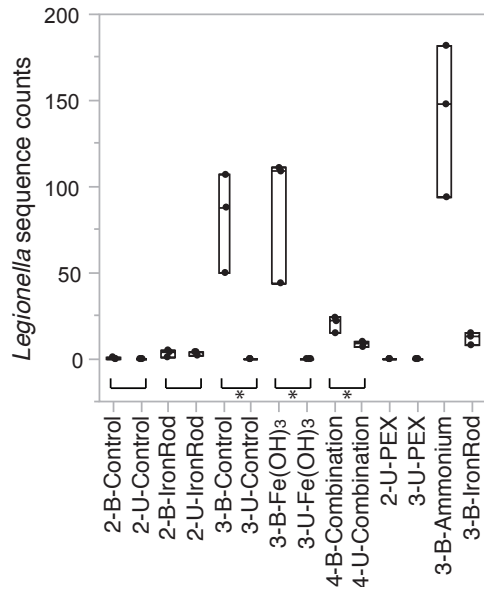

147

148 **Fig. S5.** Number of sequence reads classified as *Legionella* in samples rarefied to 18,490

149 sequences each. Samples from triplicate SWHs are grouped together. Among each group

150 indicated on the x-axis: the numbers indicate sampling day (2: 232 d, 3: 302, 4: 448 d);

151 U: unfiltered water; B: biofiltered water. \* indicates more sequence counts in SWH with

152 biofiltered water than with unfiltered water.

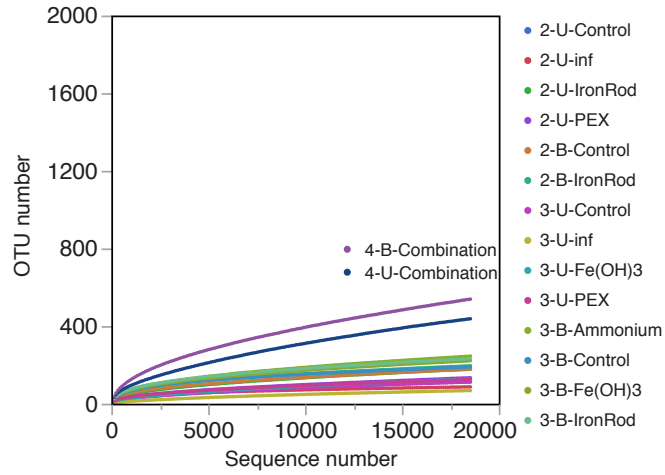

153

154 **Fig. S6.** Mean rarefaction curves of samples from triplicate SWHs. For conditions  
 155 defined in the legend, the numbers indicate sampling day (2: 232 d, 3: 302, 4: 448 d); U:  
 156 unfiltered water, B: biofiltered water; inf: influent.

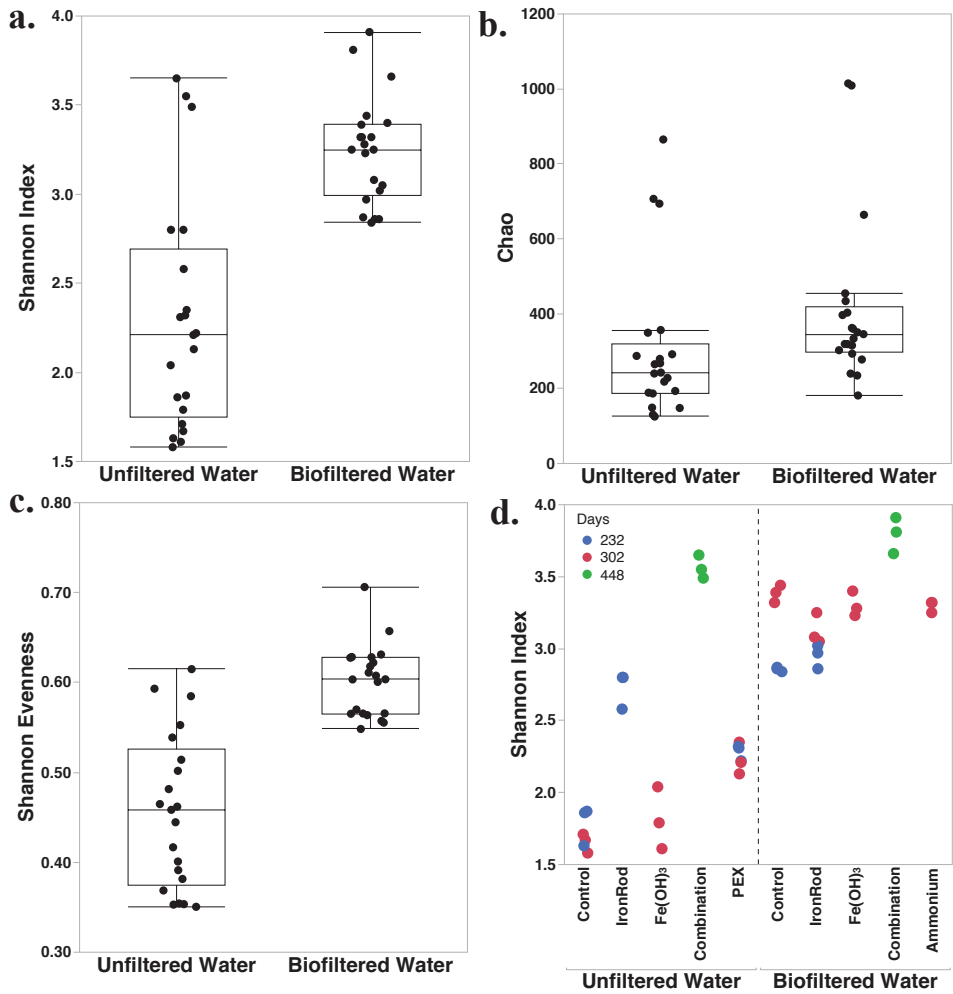

158

159 **Fig. S7.** Effect of the biofiltration and plumbing conditions on alpha diversity of hot  
 160 water microbiome. The Shannon diversity index (a), estimated richness (Chao) (b) and  
 161 Shannon evenness (c) of the microbial community in SWHs receiving biofiltered water  
 162 are shown in comparison to the ones with unfiltered water combining all plumbing  
 163 conditions. The Shannon diversity index in SWHs is further split into specific plumbing  
 164 conditions and sampling events (blue: 232 d, red: 302 d, green: 448 d) for both unfiltered  
 165 and biofiltered water (panel d).

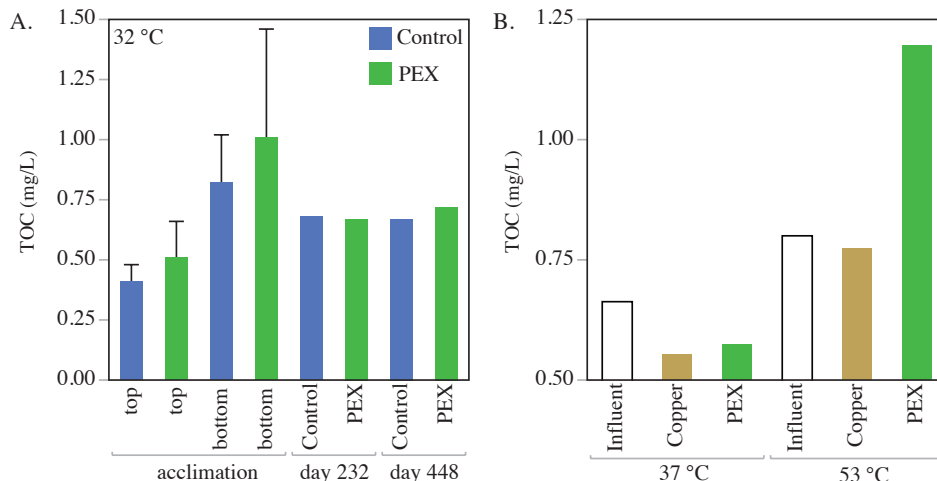

166

167 **Fig. S8.** Evaluation of organic carbon leaching from the PEX pipe in A) SWHs with PEX  
 168 pipe in comparison to the no-modification Control at 32°C and B) in a similar set of  
 169 SWHs with PEX pipe in comparison to a copper pipe incubated at 37°C and 53°C. All  
 170 SWHs were fed with biofiltered waters. Error bars show the standard deviation from 15  
 171 SWH replicates. Data without error bars were measurement from pooled water from  
 172 triplicate SWHs.

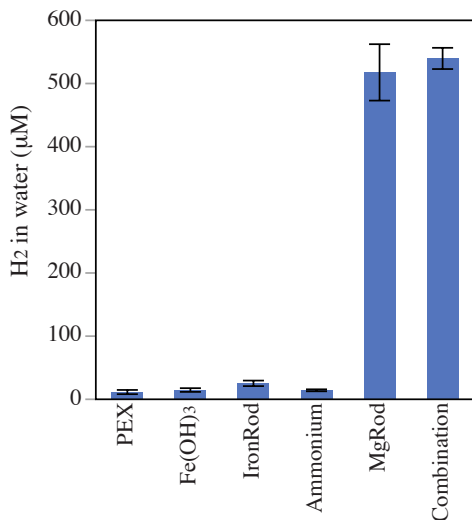

173

174 **Fig. S9.** Aqueous hydrogen concentrations in bulk water from SWHs. Error bars are  
 175 standard deviations of triplicate SWHs.

176 **Table S1.** Water chemistry in unfiltered and biofiltered influent waters. The relative  
 177 changes (%) show the effect of biofiltration (+ means increase after biofiltration; - means  
 178 reduction).

| Element     | Unfiltered influent water (ppb) | Biofiltered influent water (ppb) | Change with biofiltration |
|-------------|---------------------------------|----------------------------------|---------------------------|
| Sodium      | 15120                           | 16740                            | +10.71%                   |
| Magnesium   | 3508                            | 3566                             | +1.65%                    |
| Aluminum    | 20.00                           | 11.23                            | -43.85%                   |
| Silica      | 2998                            | 3117                             | +3.97%                    |
| Phosphorous | 203.0                           | 132.8                            | -34.58%                   |
| Potassium   | 1520                            | 1694                             | +11.45%                   |
| Calcium     | 9017                            | 9417                             | +4.44%                    |
| Vanadium    | 0.765                           | 0.826                            | +7.97%                    |
| Chromium    | 0.132                           | 0.081                            | -38.64%                   |
| Iron        | 9.296                           | 0.517                            | -94.44%                   |
| Manganese   | 0.557                           | 2.723                            | +388.87%                  |
| Nickel      | 0.345                           | 0.477                            | +38.26%                   |
| Copper      | 64.01                           | 12.61                            | -80.30%                   |
| Zinc        | 67.80                           | 85.68                            | +26.37%                   |
| Lead        | 0.350                           | 0.143                            | -59.14%                   |

179 **No error bars were available as only one measurement was conducted.**

180

181 **Table S2.** Cumulative abundance of OTUs unique to a plumbing modification in  
 182 comparison to the no-modification Control

| Abundance of OTUs unique to a plumbing modification | <b>Unfiltered water</b> | <b>Biofiltered water</b> |
|-----------------------------------------------------|-------------------------|--------------------------|
| Fe(OH) <sub>3</sub>                                 | 0.6%                    | 0.6%                     |
| PEX                                                 | 0.5%                    | na                       |
| Ammonium                                            | na                      | 2.5%                     |
| IronRod                                             | 8%                      | 2.5%                     |
| Combination                                         | 16%                     | 17%                      |

183 na: data not available because the samples were not sequenced.

184

185 **Reference:**

- 186 1. Williams, K.; Pruden, A.; Falkinham, J. O.; Edwards, M., Relationship between  
 187 organic carbon and opportunistic pathogens in simulated glass water heaters. *Pathogens*  
 188 **2015**, *4*, (2), 355-72.
- 189 2. 9217 Assimilable organic carbon.  
 190 <http://www.standardmethods.org/store/ProductView.cfm?ProductID=104>
- 191 3. Weinrich, L. A.; Giraldo, E.; Lechevallier, M. W., Development and application  
 192 of a bioluminescence-based test for assimilable organic carbon in reclaimed waters. *Appl.*  
 193 *Environ. Microbiol.* **2009**, *75*, (23), 7385-90.
